# Supplementary material for: Neurological outcome after extracorporeal cardiopulmonary resuscitation for in-hospital cardiac arrest: a systematic review and meta-analysis
Source: Springer Nature journal article supplement (doi:10.1186/s13054-020-03201-0), 2020-08-17
Supplement: MOESM1 [file 18288604]

## Appendix 1: Search terms

*Pubmed* 74

(in-hospital cardiac arrest[MeSH Terms] AND ecmo[MeSH Terms] AND (neurological outcome[Title/Abstract] OR brain injury[Title/Abstract] OR CPC[All fields] OR Cerebral Performance Category[All fields])).

*embase.com* 589

('heart arrest'/de OR 'cardiopulmonary arrest'/de OR 'sudden cardiac death'/de OR (((heart OR cardiac OR cardiopulmonary\* OR circulat\*) NEAR/3 (arrest OR death OR standstill)) OR asystol\* OR SCD OR IHCA):ab,ti) AND ('Resuscitation'/exp OR (Resuscitation OR reanimation OR CPR OR (cardiac NEAR/3 'life support')):ab,ti) AND ('extracorporeal oxygenation'/de OR 'extracorporeal membrane oxygenation device'/de OR 'extracorporeal cardiopulmonary resuscitation'/de OR 'extracorporeal therapy'/de OR 'extracorporeal life support'/de OR (((extracorpor\* OR extra-corpor\*) NEAR/3 (oxygenat\* OR life-support\* OR resuscitation OR cpr)) OR ecmo OR ecls OR ecpr):ab,ti) AND ('hospital patient'/exp OR (hospitalized OR (hospital\* NEAR/3 (patient\* OR stay\*)) OR inhospital\* OR (in NEXT/1 (hospital OR patient)) OR inpatient OR IHCA):ab,ti) NOT ([animals]/lim NOT [humans]/lim)

*Medline Ovid* 258

("Heart Arrest"/ OR exp "Death, Sudden, Cardiac"/ OR (((heart OR cardiac OR cardiopulmonary\* OR circulat\*) ADJ3 (arrest OR death OR standstill)) OR asystol\* OR SCD OR IHCA).ab,ti.) AND (exp "Resuscitation"/ OR (Resuscitation OR reanimation OR CPR OR (cardiac ADJ3 life support)).ab,ti.) AND (Extracorporeal Membrane Oxygenation/ OR (((extracorpor\* OR extra-corpor\*) ADJ3 (oxygenat\* OR life-support\* OR resuscitation OR cpr)) OR ecmo OR ecls OR ecpr).ab,ti.) AND ("Inpatients"/ OR (hospitalized OR (hospital\* ADJ3 (patient\* OR stay\*)) OR inhospital\* OR (in ADJ (hospital OR patient)) OR inpatient OR IHCA).ab,ti.) NOT (exp animals/ NOT humans/)

*Web of science* 693

TS=((((heart OR cardiac OR cardiopulmonary\* OR circulat\*) NEAR/2 (arrest OR death OR standstill)) OR asystol\* OR SCD OR IHCA)) AND ((Resuscitation OR reanimation OR CPR OR (cardiac NEAR/2 "life support"))) AND (((extracorpor\* OR extra-corpor\*) NEAR/2 (oxygenat\* OR life-support\* OR resuscitation OR cpr)) OR ecmo OR ecls OR ecpr) AND ((hospitalized OR (hospital\* NEAR/2 (patient\* OR stay\*)) OR inhospital\* OR (in NEAR/1 (hospital OR patient)) OR inpatient OR IHCA))

*Cochrane CENTRAL* 16

(((heart OR cardiac OR cardiopulmonary\* OR circulat\*) NEAR/3 (arrest OR death OR standstill)) OR asystol\* OR SCD OR IHCA):ab,ti) AND ((Resuscitation OR reanimation OR CPR OR (cardiac NEAR/3 'life support')):ab,ti) AND (((extracorpor\* OR extra-corpor\*) NEAR/3 (oxygenat\* OR life-support\* OR resuscitation OR cpr)) OR ecmo OR ecls OR ecpr):ab,ti) AND ((hospitalized OR (hospital\* NEAR/3 (patient\* OR stay\*)) OR inhospital\* OR (in NEXT/1 (hospital OR patient)) OR inpatient OR IHCA):ab,ti)
