# Supplementary material for: Neurological outcome after extracorporeal cardiopulmonary resuscitation for in-hospital cardiac arrest: a systematic review and meta-analysis
Source: Springer Nature journal article supplement (doi:10.1186/s13054-020-03201-0), 2020-08-17
Supplement: MOESM2 [file 18288604]

## Appendix 2

Table 1: CPC scores

|                                 | <b>CPC Grade</b> | <b>CPC Specification</b>                                          |
|---------------------------------|------------------|-------------------------------------------------------------------|
| Favourable neurological outcome | 1                | Full recovery or mild disability                                  |
|                                 | 2                | Moderate disability but independent in activities of daily living |
| Bad neurological outcome        | 3                | Severe disability; dependent in activities of daily living        |
|                                 | 4                | Persistent vegetative state                                       |
|                                 | 5                | Dead                                                              |

Table 2: GOS-scores

|                                 | <b>GOS Grade</b> | <b>GOS specification</b>                                          |
|---------------------------------|------------------|-------------------------------------------------------------------|
| Bad neurological outcome        | 1                | Dead                                                              |
|                                 | 2                | Persistent vegetative state                                       |
|                                 | 3                | Severe disability; dependent in activities of daily living        |
| Favourable neurological outcome | 4                | Moderate disability but independent in activities of daily living |
|                                 | 5                | Full recovery or mild disability                                  |
